# Supplementary material for: A three-dimensional ex vivo tri-culture model mimics cell-cell interactions between acute myeloid leukemia and the vascular niche
Source: PubMed Central journal article supplement — Haematologica. 2017 Mar 30;102(7):1215–26. doi: 10.3324/haematol.2016.157883 (PMC5566030; doi:10.3324/haematol.2016.157883), 2017-07
Supplement: 2016_157883-Disclosures_and_Contributions.pdf [file 2016_157883-Disclosures_and_Contributions.pdf]

Haematologica  
HAEMATOL/2016/157883  
Version 5

A three-dimensional ex vivo tri-culture model mimics cell-cell interactions between acute myeloid leukemia and the vascular niche

Laura J Bray, Marcus Binner, Yvonne Körner, Malte von Bonin, Martin Bornhäuser, and Carsten Werner

Disclosures: None.

Contributions: Laura J.B., Malte vB., Martin B., and Carsten W. designed experiments; Laura J.B., Marcus B., and Yvonne K. performed experiments; Laura J.B., Marcus B., and Yvonne K. performed analyses of results; Laura J.B., Marcus B., Malte vB., Martin B., and Carsten W. interpreted experimental results; and Laura J.B., Marcus B., Malte vB., Martin B., and Carsten W. wrote the manuscript.
