# Supplementary material for: A three-dimensional ex vivo tri-culture model mimics cell-cell interactions between acute myeloid leukemia and the vascular niche
Source: PubMed Central journal article supplement — Haematologica. 2017 Mar 30;102(7):1215–26. doi: 10.3324/haematol.2016.157883 (PMC5566030; doi:10.3324/haematol.2016.157883), 2017-07
Supplement: HAEMATOL-2016-157883v5-Bray-01.pdf [file HAEMATOL-2016-157883v5-Bray-01.pdf]

# 3D tri-culture model provides a specialized platform for the investigation of cell-cell interactions and new insights into acute myeloid leukemia development and therapies

## Leukemia cell lines

KG1a  
MOLM13  
OCI-AML3  
MV4-11

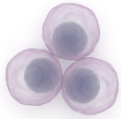

## Primary cells from AML patients

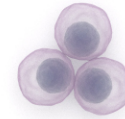

3D tri-cultures

matrix metalloproteinase-sensitive hydrogels

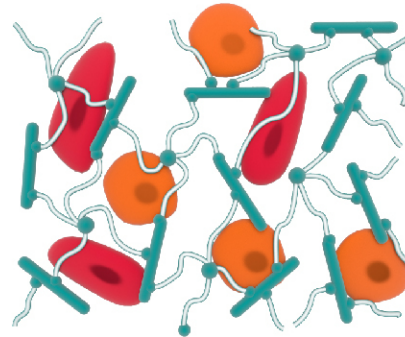

- poly(ethylene glycol)
- heparin
- mesenchymal stromal cells
- endothelial cells

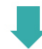

- AML 3D tri-cultures demonstrate increased resistance to Daunorubicin and Cytarabine
- CXCR4 antagonist, AMD3100, induces AML mobilization from the vascular network
